# Supplementary material for: Serum metabolite profiling of a 4-Nitroquinoline-1-oxide-induced experimental oral carcinogenesis model using gas chromatography-mass spectrometry
Source: PeerJ journal article supplement (doi:10.7717/peerj.10619), 2021-01-04
Supplement: Datasets.xls.zip [file Datasets.xls]

## Sheet: Sheet1
	A66-5		A32-2		A67-1		N4		A20-1		A13-4		A9-5		N		A13-1		A66-3		A66-1		A32-3		A24-4		A24-3		A20-5		A13-5		A13-3		A9-1		N1		N5		N2		A9-2		A9-4		A13-2		A66-2
	0.055	11611662	0.055	72790288	0.055	13552778	0.055	71875296	0.055	144565904	0.055	168881888	0.055	187470800	0.055	249216656	0.055	24530028	0.055	23867788	0.055	25031876	0.055	25100522	0.055	22517718	0.055	27636712	0.055	21391644	0.055	26295164	0.055	26653194	0.055	28213632	0.055	23004298	0.055	25060664	0.055	14004867	0.055	14072220	0.055	16277043	0.055	14530616	0.055
	0.093	12033855	0.092	67756448	0.093	13706318	0.092	79403040	0.092	181708784	0.092	267402208	0.092	122342008	0.093	143122992	0.092	25295416	0.092	24700648	0.092	24601232	0.092	24770056	0.092	23195240	0.092	24292242	0.093	24694194	0.092	25545490	0.092	24708370	0.092	24119360	0.093	26195324	0.092	26854298	0.092	15059135	0.093	17512136	0.092	17762674	0.092	18628968	0.092
	0.13	14163656	0.13	68532848	0.13	18534516	0.13	66205680	0.13	139831392	0.13	218601840	0.13	199461344	0.13	226781344	0.13	27218564	0.13	23942812	0.13	27385842	0.13	25449210	0.13	23020564	0.13	28694352	0.13	22174682	0.13	26118922	0.13	24009842	0.13	23920392	0.13	24557024	0.13	26930044	0.13	14447801	0.13	15376082	0.13	19158768	0.13	17440440	0.13
	0.167	18238004	0.167	54227216	0.167	20893254	0.167	54231724	0.167	176070416	0.167	217965424	0.167	142334080	0.167	217026096	0.167	27647696	0.167	24546702	0.167	24190656	0.167	26597686	0.167	22816210	0.167	27728270	0.167	21999970	0.167	26040376	0.167	24045652	0.167	27867734	0.167	27984344	0.167	25852628	0.167	13607585	0.167	15080992	0.167	16725997	0.167	16940634	0.167
	0.204	23506002	0.204	52025540	0.204	25643558	0.204	53118380	0.204	129117904	0.204	166007296	0.204	128193352	0.204	193180048	0.204	24871314	0.204	21306744	0.204	26192102	0.204	26589090	0.204	21973460	0.204	31514400	0.204	21030356	0.204	23649172	0.204	28337504	0.204	21807052	0.204	22309830	0.204	26995386	0.204	14710456	0.204	15214691	0.204	16417608	0.204	12907604	0.204
	0.241	20996420	0.241	43975572	0.241	22709416	0.241	43450372	0.241	117492224	0.241	145752112	0.241	118446272	0.241	266426544	0.241	24338944	0.241	21884928	0.241	25116560	0.241	21344012	0.241	20666542	0.241	29824672	0.241	23015138	0.241	22818216	0.241	24214440	0.241	22047850	0.241	25231742	0.241	29607654	0.241	14572075	0.241	15242084	0.241	17762406	0.241	12508517	0.241
	0.278	21634820	0.278	35484188	0.278	21928046	0.278	38788228	0.278	131510936	0.278	186960096	0.278	105413672	0.278	249681248	0.278	24097494	0.278	22013276	0.278	23689934	0.278	24205776	0.278	20732776	0.278	24823402	0.278	20711676	0.278	22572460	0.278	20691428	0.278	21268630	0.278	21439036	0.278	20827420	0.278	12963349	0.278	12637799	0.278	16237165	0.278	15975318	0.278
	0.315	22675492	0.315	28263342	0.315	19821098	0.315	33940732	0.315	113975328	0.315	164954176	0.315	144712880	0.315	179398992	0.315	21680464	0.315	20242166	0.315	20267586	0.315	23708542	0.315	17571710	0.315	23251778	0.315	24471900	0.315	22512056	0.315	22933228	0.315	24817070	0.315	19344474	0.315	20984098	0.315	14406691	0.315	12487363	0.315	16980130	0.315	15263111	0.315
	0.353	20766390	0.352	29093316	0.353	20306266	0.352	27405502	0.352	102528944	0.352	100938768	0.352	85355688	0.353	142188992	0.352	20986386	0.352	18555028	0.352	20131976	0.352	18824662	0.352	19938472	0.352
[truncated: 11 more columns]
